# Supplementary material
Source: PubMed Central journal article supplement (PMC5788496)
Supplement: kaup-13-11-1358848-s001.pdf [file kaup-13-11-1358848-s001.pdf]

Raw file: MaX-16-G186-T1-AspN-HF  
 Scan: 19785  
 Method: FTMS; HCD  
 Score: 109.5  
 m/z: 605.29  
 Gene names: BECN1

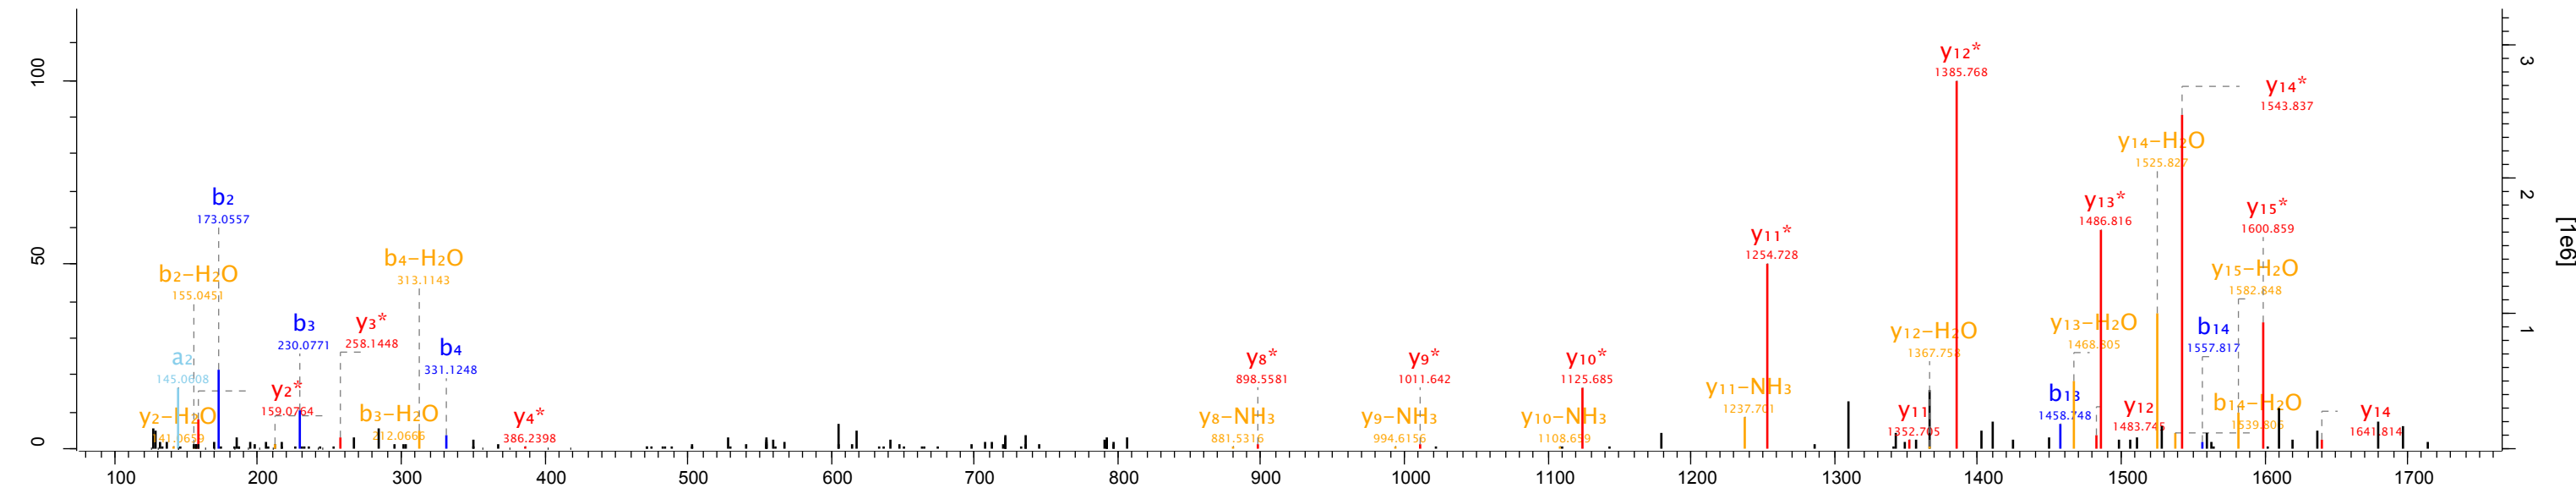

- D G G T M E N L S R R L K V T G -

b<sub>2</sub> b<sub>3</sub> b<sub>4</sub>
b<sub>13</sub> b<sub>14</sub>

T119
