# Supplementary material
Source: PubMed Central journal article supplement (PMC5788496)

Raw file: MaX-16-G186-T1-AspN-HF  
 Scan: 28427  
 Method: FTMS; HCD  
 Score: 122.35  
 m/z: 898.75  
 Gene names: BECN1

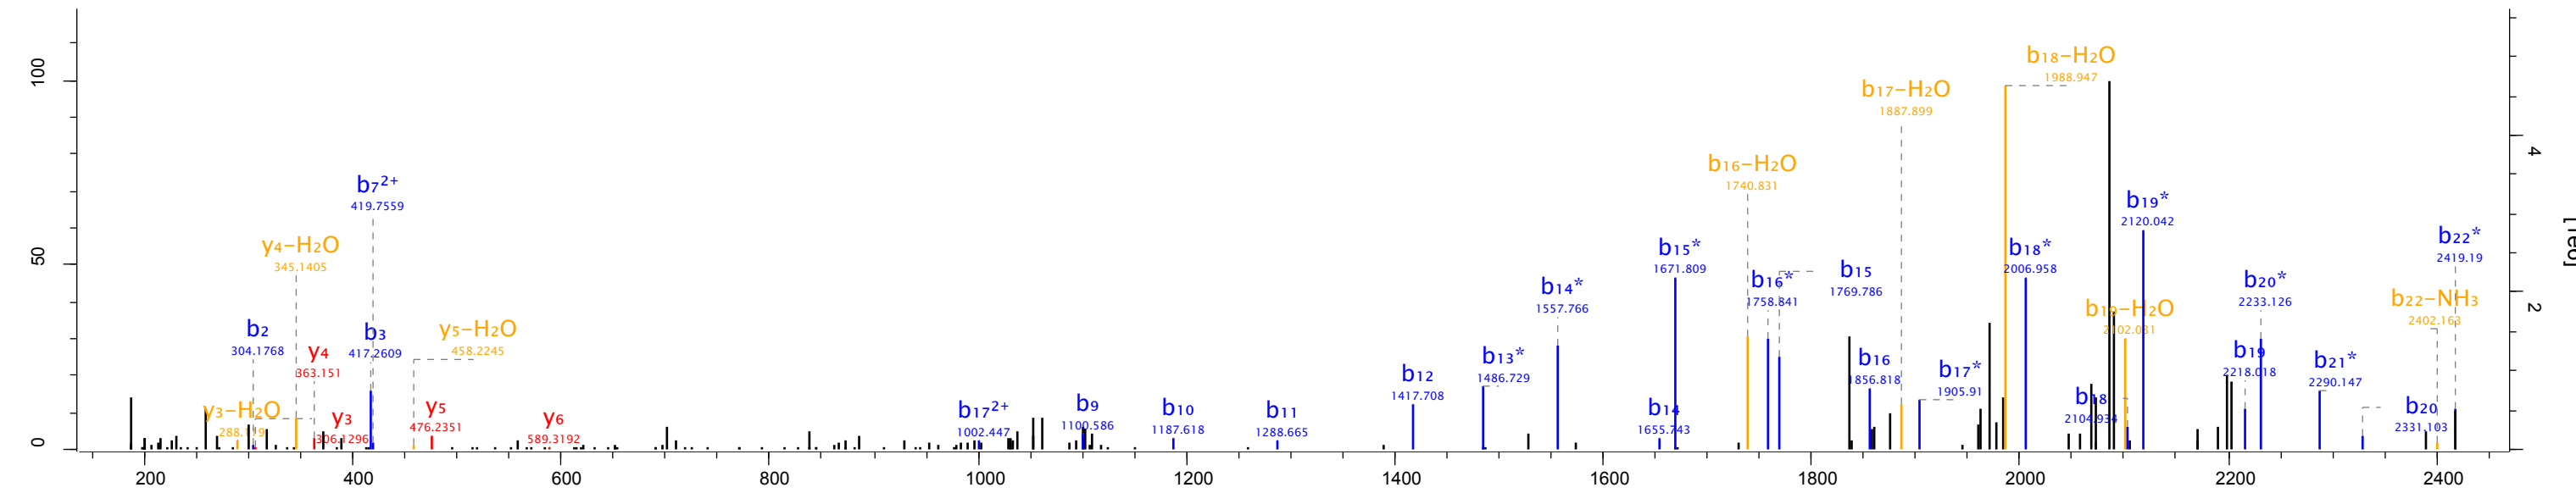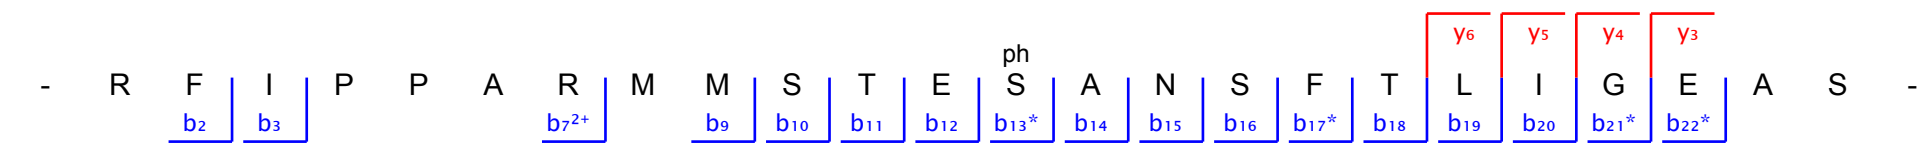

S93

Supplement: kaup-13-11-1358848-s002.pdf [file kaup-13-11-1358848-s002.pdf]
